# Supplementary material
Source: PubMed Central journal article supplement (PMC4843694)

## Electronic supplementary material

Flores-Moreno, H., Reich, P.B., Lind, E.M., Sullivan, L.L, Seabloom, E.W., Yahdjian, L., MacDougall, A.S., Reichmann, L., Alberti, J., Bez, S., Bakker, J.D., Cadotte, M.W., Caldeira, M.C., Chaneton, E.J., D'Antonio, C., Fay, P.A., Firn, J., Hagenah, N., Harpole, W.S., Iribarne, O., Kirkman, K.P., Knops, J.M.H., La Pierre, K.J., Laungani, R., Leakey, A.D.B., McCulley, R.L., Moore, J.L., Pascual, J., Borer, E.T. 2016. Climate modifies response of non-native and native species richness to nutrient enrichment. *Philosophical Transactions of the Royal Society B: Biological Sciences*. doi: 10.1098/rstb.2015.0273

## Supplementary material 1: Correlation between climate variables and models descriptions

**Table S1.1:** Correlation between climate variables during the growing season

| Variables        | Mean precip | Mean Temp | Mean water avail | Var precip | Var temp |
|------------------|-------------|-----------|------------------|------------|----------|
| Mean Temp        | 0.22        |           |                  |            |          |
| Mean water avail | 0.49        | -0.54     |                  |            |          |
| Var precip       | 0.16        | -0.21     | 0.22             |            |          |
| Var temp         | 0.30        | 0.46      | -0.05            | -0.35      |          |
| Var water avail  | 0.31        | -0.46     | 0.84             | 0.22       | -0.04    |

**Table S1.2:** Correlation between extreme climate events (i.e. extreme hot, dry, cold and wet)

| Variables        | Max precip | Min precip | Min temp | Max temp |
|------------------|------------|------------|----------|----------|
| Min precip       | 0.43       |            |          |          |
| Min temp         | 0.24       | -0.09      |          |          |
| Max temp         | -0.43      | -0.19      | -0.26    |          |
| Mean water avail | -0.03      | 0.04       | 0.24     | -0.13    |

**Table S1.3:** Correlation between annual climate variables

| Variables        | Mean precip | Mean Temp | Mean water avail | Var precip | Var temp |
|------------------|-------------|-----------|------------------|------------|----------|
| Mean Temp        | -0.14       |           |                  |            |          |
| Mean water avail | 0.53        | -0.48     |                  |            |          |
| Var precip       | -0.86       | 0.17      | -0.32            |            |          |
| Var temp         | 0.26        | -0.46     | -0.11            | -0.22      |          |
| Var water avail  | 0.31        | -0.41     | 0.89             | -0.19      | -0.16    |

**Table S1.4:** Correlation between long-term climate variables

| Variables        | Mean precip | Mean Temp | Mean water avail | Var precip | Var temp |
|------------------|-------------|-----------|------------------|------------|----------|
| Mean Temp        | 0.08        |           |                  |            |          |
| Mean water avail | 0.84        | -0.25     |                  |            |          |
| Var precip       | -0.38       | 0.30      | -0.42            |            |          |
| Var temp         | -0.15       | -0.54     | -0.03            | -0.25      |          |
| Var water avail  | 0.71        | -0.02     | 0.78             | -0.01      | -0.18    |

**Table S1.5:** Details on climate variables for each model. Notice that each climate variable interacts with species' provenance (native or non-native). Climate-only models only include two-way interactions between climate variables and species provenance, while models that include climate variables and the nutrients treatments (N, P, K and their combinations), include two way interactions for species' provenance and climate variables or nutrient treatments, and three-way interactions between climate variables, nutrient treatments and species' provenance. When two or more variables were collinear alternate models that did not include the collinear variables were fitted (see methods). In the first column, between parentheses are the collinear variable retained in each models.

| <b>Model</b>                              | <b>Climate models</b>                                                      |
|-------------------------------------------|----------------------------------------------------------------------------|
|                                           | Climate predictors                                                         |
| <b>Growing season</b>                     |                                                                            |
| Mean                                      | (mean pre + mean temp + water avail) · provenance                          |
| Var                                       | (var pre + var temp + var water avail) · provenance                        |
| Mean + Var (water avail)                  | (mean pre + mean temp + water avail + var pre + var temp) · provenance     |
| Mean + Var (var water avail)              | (mean pre + mean temp + var pre + var temp + var water avail) · provenance |
| <b>Annual extreme events</b>              |                                                                            |
| Extreme events                            | (dry + wet + hot + cold) · provenance + water avail                        |
| <b>Annual</b>                             |                                                                            |
| Mean                                      | ( mean pre + mean temp + water avail) · provenance                         |
| Var                                       | (var pre + var temp + var water avail) · provenance                        |
| Mean + Var (mean pre and water avail)     | (mean pre + mean temp + water avail + var temp) · provenance               |
| Mean + Var (mean pre and var water avail) | (mean pre + mean temp + var temp + var water avail) · provenance           |
| Mean + Var (var pre and water avail)      | (mean temp + water avail + var pre + var temp) · provenance                |
| Mean + Var (var pre and var water avail)  | (mean temp + var pre + var temp + var water avail) · provenance            |
| <b>Long-term</b>                          |                                                                            |
| Mean (mean pre)                           | (mean pre + mean temp) · provenance                                        |
| Mean (water avail)                        | (mean temp + water avail) · provenance                                     |
| Var                                       | (var pre + var temp + var water avail) + provenance                        |
| Mean + Var (mean pre)                     | (mean pre + mean temp + var temp + var pre) · provenance                   |
| Mean + Var (water avail)                  | (mean temp + water avail + var pre + var temp) · provenance                |
| Mean + Var (var water avail)              | (mean temp + var pre + var temp + var water avail) · provenance            |

## Supplementary material 2: Comparison of the effect of climate, nutrient and their interaction on non-native and native species

**Table S2.1:** Comparison of regression models used to describe the influence of growing season, annual and long-term climate variables on richness and abundance of native and non-native species under natural conditions. Shown are values of  $\Delta AIC$  (comparison of AIC values to the best model AIC;  $\Delta AIC = AIC_{modeli} - minAIC$ ). The  $\Delta AIC$  score for the best models are in bold (treshold for  $\Delta AIC$  is  $\Delta AIC > 2$ ). Mean refers to models including only mean climate variables, Var refers to models only including variance of the same climate variables, Mean + var are models that include both type of climate variables. Extreme events are models that include the number of extreme hot, cold, wet and dry events.

| Model                                     | Richness models |              | Abundance models |              |
|-------------------------------------------|-----------------|--------------|------------------|--------------|
|                                           | k               | $\Delta AIC$ | k                | $\Delta AIC$ |
| <b>Growing season</b>                     |                 |              |                  |              |
| Mean                                      | 9               | 6.28         | 9                | 28.58        |
| Var                                       | 9               | 7.07         | 9                | 17.52        |
| Mean + Var (water avail)                  | 13              | 8.46         | 13               | 21.84        |
| Mean + Var (var water avail)              | 13              | 5.94         | 13               | 18.65        |
| <b>Annual extreme events</b>              |                 |              |                  |              |
| Extreme events                            | 12              | 7.07         | 12               | 19.71        |
| <b>Annual</b>                             |                 |              |                  |              |
| Mean                                      | 9               | 6.75         | 9                | 18.77        |
| Var                                       | 9               | 7.07         | 9                | 17.13        |
| Mean + Var (mean pre and water avail)     | 11              | 9.57         | 11               | 19.15        |
| Mean + Var (mean pre and var water avail) | 11              | 9.66         | 11               | 20.44        |
| Mean + Var (var pre and water avail)      | 11              | 9.59         | 11               | 19.03        |
| Mean + Var (var pre and var water avail)  | 11              | 9.09         | 11               | 17.96        |
| <b>Long-term</b>                          |                 |              |                  |              |
| Mean (mean pre)                           | 7               | 12.85        | 7                | 24.85        |
| Mean (water avail)                        | 7               | 13.08        | 7                | 25.47        |
| Var                                       | 9               | 2.31         | 9                | 5.64         |
| Mean + Var (mean pre)                     | 11              | <b>0.20</b>  | 11               | <b>0.00</b>  |
| Mean + Var (water avail)                  | 11              | <b>0.00</b>  | 11               | 4.84         |
| Mean + Var (var water avail)              | 11              | 2.46         | 11               | 8.28         |

**Table S2.2:** Effect of long-term climate variables on non-native and native species richness. Results for both the best and second best models are presented as these models are indistinguishable from each other based on  $\Delta\text{AIC}$  scores.

| Terms                                                           | Log ratio chisq | d.f. | P        |
|-----------------------------------------------------------------|-----------------|------|----------|
| <b>Best model (<math>\Delta\text{AIC} = 0</math>)</b>           |                 |      |          |
| Mean temp                                                       | 0.02            | 1    | 0.88     |
| Var temp                                                        | 0.12            | 1    | 0.73     |
| Var pre                                                         | 1.67            | 1    | 0.20     |
| Water avail                                                     | 0.06            | 1    | 0.80     |
| Local provenance                                                | 50.09           | 1    | < 0.0001 |
| Mean temp · Local provenance                                    | 2.69            | 1    | 0.10     |
| Var temp · Local provenance                                     | 2.67            | 1    | 0.10     |
| Var pre · Local provenance                                      | 14.15           | 1    | 0.0002   |
| Water avail · Local provenance                                  | 2.75            | 1    | 0.10     |
| <b>Second best model (<math>\Delta\text{AIC} = 0.20</math>)</b> |                 |      |          |
| Mean temp                                                       | 0.002           | 1    | 0.97     |
| Mean pre                                                        | 0.98            | 1    | 0.32     |
| Var temp                                                        | 0.05            | 1    | 0.82     |
| Var pre                                                         | 2.41            | 1    | 0.12     |
| Local provenance                                                | 50.95           | 1    | < 0.0001 |
| Mean temp · Local provenance                                    | 4.59            | 1    | 0.03     |
| Mean pre · Local provenance                                     | 1.62            | 1    | 0.20     |
| Var temp · Local provenance                                     | 3.62            | 1    | 0.06     |
| Var pre · Local provenance                                      | 13.30           | 1    | 0.0003   |

**Table S2.3:** Coefficients estimates, standard errors, and 2.5% and 97.5% confidence intervals for the effect of long-term climate variables on non-native and native species richness. Results for both the best and second best models are presented as these models are indistinguishable from each other based on  $\Delta\text{AIC}$  scores.

| Terms                                      | Estimates | S.E.  | 2.5% CI | 97.5% CI |
|--------------------------------------------|-----------|-------|---------|----------|
| <b>Best model (DeltaAIC = 0)</b>           |           |       |         |          |
| Mean temp                                  | -0.05     | 0.03  | -0.12   | 0.03     |
| Var temp                                   | -1.37     | 0.92  | -3.14   | 0.45     |
| Var pre                                    | 59.64     | 16.57 | 25.59   | 95.64    |
| Water avail                                | 0.32      | 0.23  | -0.15   | 0.81     |
| Local provenance (native)                  | 0.94      | 1.08  | -1.27   | 3.11     |
| Mean temp · Local provenance (native)      | 0.08      | 0.05  | -0.02   | 0.17     |
| Var temp · Local provenance (native)       | 1.95      | 1.26  | -0.39   | 4.30     |
| Var pre · Local provenance (native)        | -92.83    | 23.11 | -141.09 | -44.71   |
| Water avail · Local provenance (native)    | -0.56     | 0.32  | -1.21   | 0.10     |
| <b>Second best model (DeltaAIC = 0.20)</b> |           |       |         |          |
| Mean temp                                  | -0.06     | 0.03  | -0.13   | 0.01     |
| Mean pre                                   | 0.99      | 0.64  | -0.22   | 2.17     |
| Var temp                                   | -1.45     | 0.91  | -3.16   | 0.31     |
| Var pre                                    | 61.45     | 16.92 | 27.55   | 97.30    |
| Local provenance (native)                  | 3.18      | 2.80  | -2.26   | 8.58     |
| Mean temp · Local provenance (native)      | 0.10      | 0.04  | 0.01    | 0.19     |
| Mean pre · Local provenance (native)       | -1.08     | 0.88  | -2.75   | 0.59     |
| Var temp · Local provenance (native)       | 2.22      | 1.24  | -0.07   | 4.50     |
| Var pre · Local provenance (native)        | -89.46    | 23.57 | -137.40 | -41.62   |

**Table S2.4:** Effect of long-term mean and variance in climate on non-native and native species abundance.

| Terms                        | Sum Sq | d.f. | F-value | P-value  |
|------------------------------|--------|------|---------|----------|
| Mean pre                     | 1.23   | 1    | 2.20    | 0.14     |
| Mean temp                    | 0.43   | 1    | 0.78    | 0.38     |
| Var temp                     | 0.47   | 1    | 0.84    | 0.36     |
| Var pre                      | 1.55   | 1    | 2.77    | 0.10     |
| Local provenance             | 8.67   | 1    | 15.50   | 0.0002   |
| Mean pre · Local provenance  | 4.64   | 1    | 8.29    | 0.005    |
| Mean temp · Local provenance | 0.31   | 1    | 0.56    | 0.46     |
| Var temp · Local provenance  | 0.03   | 1    | 0.05    | 0.83     |
| Var pre · Local provenance   | 16.97  | 1    | 30.32   | < 0.0001 |
| Residuals                    | 50.37  | 90   |         |          |

**Table S2.5:** Coefficients estimates, standard errors, and 2.5% and 97.5% confidence intervals for the effect of long-term climate variables on non-native and native species abundance.

| Terms                                 | Estimates | S.E.  | 2.5% CI | 97.5% CI |
|---------------------------------------|-----------|-------|---------|----------|
| Mean pre                              | 1.936     | 0.63  | 0.69    | 3.18     |
| Mean temp                             | 0.003     | 0.03  | -0.06   | 0.07     |
| Var temp                              | 0.436     | 0.88  | -1.32   | 2.19     |
| Var pre                               | 86.588    | 17.07 | 52.67   | 120.51   |
| Local provenance (native)             | 8.836     | 2.84  | 3.20    | 14.47    |
| Mean pre · Local provenance (native)  | -2.556    | 0.89  | -4.32   | -0.79    |
| Mean temp · Local provenance (native) | 0.034     | 0.05  | -0.06   | 0.12     |
| Var temp · Local provenance (native)  | 0.272     | 1.25  | -2.21   | 2.75     |
| Var pre · Local provenance (native)   | -132.952  | 24.15 | -180.92 | -84.98   |

**Table S2.6:** Comparison of models used to describe the influence of growing season, annual and long-term climate variables on change in richness and abundance of native and non-native species under natural conditions. Shown are values of  $\Delta AIC$  (comparison of AIC values to the best model AIC;  $\Delta AIC = AIC_{modeli} - minAIC$ ). The  $\Delta AIC$  score for the best models are in bold (treshold for  $\Delta AIC$  is  $\Delta AIC > 2$ ). Mean refers to models including only mean climate variables, Var refers to models only including variance in the same climate variables, Mean + var are models that include both type of climate variables. Extreme events are models that include the number of extreme hot, cold, wet and dry days.

| Model                                     | Change richness |              | Change abundance |              |
|-------------------------------------------|-----------------|--------------|------------------|--------------|
|                                           | k               | $\Delta AIC$ | k                | $\Delta AIC$ |
| <b>Growing season</b>                     |                 |              |                  |              |
| Mean                                      | 12              | 30.20        | 12               | 22.40        |
| Var                                       | 12              | 54.30        | 12               | 29.40        |
| Mean + var (water avail)                  | 16              | 48.90        | 16               | 30.80        |
| Mean + var (var water avail)              | 16              | 49.30        | 16               | 30.30        |
| <b>Annual extreme events</b>              |                 |              |                  |              |
| Extreme events                            | 15              | 62.90        | 15               | 36.10        |
| <b>Annual</b>                             |                 |              |                  |              |
| Mean                                      | 12              | 30.20        | 12               | 16.20        |
| Var                                       | 12              | 43.70        | 12               | 26.30        |
| Mean + var (mean pre and water avail)     | 14              | 41.10        | 14               | 23.60        |
| Mean + var (mean pre and var water avail) | 14              | 50.70        | 14               | 29.20        |
| Mean + var (var pre and water avail)      | 14              | 35.10        | 14               | 22.70        |
| Mean + var (var pre and var water avail)  | 14              | 47.50        | 14               | 29.70        |
| <b>Long-term</b>                          |                 |              |                  |              |
| Mean (mean pre)                           | 10              | <b>0.00</b>  | 10               | 2.13         |
| Mean (water avail)                        | 10              | 8.03         | 10               | <b>0.00</b>  |
| Var                                       | 12              | 24.10        | 12               | 24.10        |
| Mean + var (mean pre)                     | 14              | 5.20         | 14               | 8.91         |
| Mean + var (water avail)                  | 14              | 19.30        | 14               | 5.34         |
| Mean + var (var water avail)              | 14              | 28.20        | 14               | 20.90        |



**Table S2.7:** Effect of long-term mean climate variables on non-native and native species richness.

| Terms                        | Chisq | d.f. | P-value  |
|------------------------------|-------|------|----------|
| Mean pre                     | 1.827 | 1    | 0.18     |
| Mean temp                    | 0.70  | 1    | 0.40     |
| Local provenance             | 29.72 | 1    | < 0.0001 |
| Year of trt                  | 1.33  | 1    | 0.25     |
| Mean pre · Local provenance  | 38.68 | 1    | < 0.0001 |
| Mean temp · Local provenance | 15.14 | 1    | 0.0001   |

**Table S2.8:** Coefficients estimates, standard errors and 2.5% and 97.5% confidence intervals for the effect of long-term mean climate variables on non-native and native species change in richness.

| Terms                                 | Estimates | S.E. | 2.5% CI | 97.5% CI |
|---------------------------------------|-----------|------|---------|----------|
| Mean pre                              | 0.07      | 0.05 | -0.03   | 0.16     |
| Mean temp                             | 0.04      | 0.05 | -0.06   | 0.15     |
| Local provenance (native)             | 0.11      | 0.02 | 0.07    | 0.15     |
| Year of trt                           | -0.03     | 0.02 | -0.07   | 0.02     |
| Mean pre · Local provenance (native)  | -0.26     | 0.04 | -0.34   | -0.18    |
| Mean temp · Local provenance (native) | -0.16     | 0.04 | -0.24   | -0.08    |

**Table S2.9:** Effect of long-term mean climate variables on non-native and native species change in abundance.

| Terms                          | Chi Sq | d.f. | P-value  |
|--------------------------------|--------|------|----------|
| Mean temp                      | 1.70   | 1    | 0.19     |
| Water avail                    | 1.66   | 1    | 0.20     |
| Local provenance               | 47.78  | 1    | < 0.0001 |
| Year of trt                    | 0.69   | 1    | 0.41     |
| Mean temp · Local Provenance   | 13.58  | 1    | 0.0002   |
| Water avail · Local Provenance | 21.74  | 1    | < 0.0001 |

**Table S2.10:** Coefficients estimates, standard errors, 2.5% and 97.5% confidence intervals for the effect of long-term mean climate variables on non-native and native species change in abundance.

| Terms                                   | Estimates | S.E. | 2.5% CI | 97.5% CI |
|-----------------------------------------|-----------|------|---------|----------|
| Mean temp                               | 0.16      | 0.12 | -0.07   | 0.39     |
| Water avail                             | 0.14      | 0.11 | -0.08   | 0.35     |
| Local provenance (native)               | 0.36      | 0.05 | 0.25    | 0.46     |
| Year of trt                             | -0.04     | 0.05 | -0.15   | 0.06     |
| Mean temp · Local provenance (native)   | -0.41     | 0.11 | -0.63   | -0.19    |
| Water avail · Local provenance (native) | -0.52     | 0.11 | -0.73   | -0.30    |

**Table S2.11:** Effect of nutrient enrichment (N,P,K and their combinations) on non-native and native species' change in richness

| Terms                                 | Chi sq | d.f. | P-value  |
|---------------------------------------|--------|------|----------|
| Nutrient treatment                    | 23.58  | 7    | 0.001    |
| Local provenance                      | 10.11  | 1    | 0.001    |
| Year of trt of treatment              | 6.08   | 1    | 0.01     |
| Nutrient treatment · Local Provenance | 44.46  | 7    | < 0.0001 |

**Table S2.12:** Coefficients estimates, standard errors and 2.5 and 97.5 confidence intervals for the effect of nutrient treatments (N,P,K and their combinations) on non-native and native species change in richness.

| Terms                  | Estimates | S.E. | 2.5% CI | 97.5% CI |
|------------------------|-----------|------|---------|----------|
| N                      | 0.03      | 0.02 | -0.002  | 0.06     |
| P                      | 0.04      | 0.02 | 0.009   | 0.07     |
| K                      | 0.04      | 0.02 | 0.009   | 0.07     |
| NP                     | 0.003     | 0.02 | -0.03   | 0.04     |
| NK                     | 0.04      | 0.02 | 0.005   | 0.07     |
| PK                     | 0.04      | 0.02 | 0.006   | 0.07     |
| NPK                    | -0.01     | 0.02 | -0.04   | 0.02     |
| Local provenance       | 0.14      | 0.02 | 0.09    | 0.18     |
| Year of treatment      | -0.04     | 0.02 | -0.08   | -0.009   |
| N · Local Provenance   | -0.11     | 0.03 | -0.18   | -0.05    |
| P · Local Provenance   | -0.11     | 0.03 | -0.17   | -0.04    |
| K · Local Provenance   | -0.09     | 0.03 | -0.15   | -0.02    |
| NP · Local Provenance  | -0.10     | 0.03 | -0.17   | -0.04    |
| NK · Local Provenance  | -0.17     | 0.03 | -0.24   | -0.11    |
| PK · Local Provenance  | -0.11     | 0.03 | -0.17   | -0.04    |
| NPK · Local Provenance | -0.19     | 0.03 | -0.26   | -0.13    |

**Figure S2.1:** Effect of nutrient enrichment (N,P,K and their combinations) on non-native and native species' change in richness.

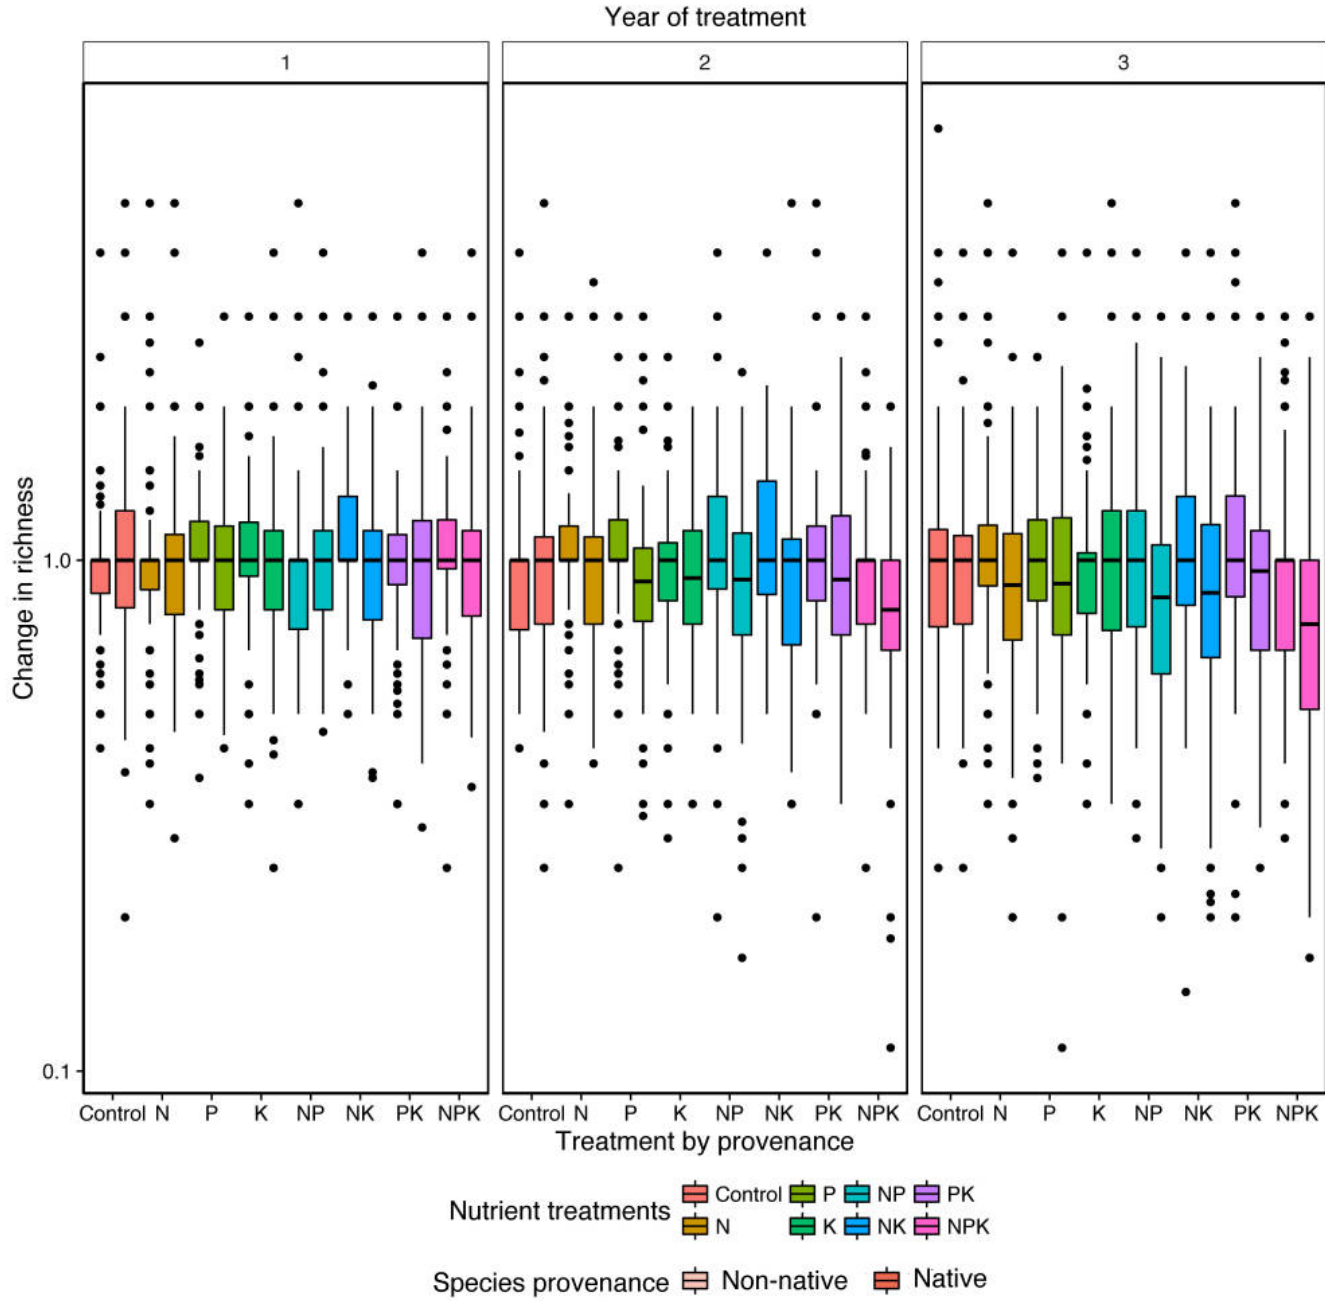

**Table S2.13:** Effect of nutrient enrichment (N,P,K and their combinations) on non-native and native species' change in abundance

| Terms                                 | Chi sq | d.f. | P-value  |
|---------------------------------------|--------|------|----------|
| Nutrient treatment                    | 30.57  | 7    | < 0.0001 |
| Local provenance                      | 11.12  | 1    | 0.0009   |
| Year of treatment                     | 0.77   | 1    | 0.38     |
| Nutrient treatment · Local Provenance | 54.92  | 7    | < 0.0001 |

**Table S2.14:** Coefficients estimates, standard errors and 2.5% and 97.5% confidence intervals for the effect of nutrient treatments (N,P,K and their combinations) on non-native and native species change in abundance.

| Terms                  | Estimates | S.E. | 2.5% CI | 97.5% CI |
|------------------------|-----------|------|---------|----------|
| N                      | 0.13      | 0.04 | 0.06    | 0.20     |
| P                      | 0.11      | 0.04 | 0.04    | 0.18     |
| K                      | 0.11      | 0.04 | 0.04    | 0.18     |
| NP                     | 0.14      | 0.04 | 0.07    | 0.22     |
| NK                     | 0.19      | 0.04 | 0.11    | 0.26     |
| PK                     | 0.14      | 0.04 | 0.06    | 0.21     |
| NPK                    | 0.11      | 0.04 | 0.04    | 0.18     |
| Local provenance       | 0.34      | 0.05 | 0.24    | 0.44     |
| Year of treatment      | -0.03     | 0.03 | -0.09   | 0.03     |
| N · Local Provenance   | -0.26     | 0.07 | -0.41   | -0.12    |
| P · Local Provenance   | -0.27     | 0.07 | -0.42   | -0.12    |
| K · Local Provenance   | -0.21     | 0.07 | -0.36   | -0.07    |
| NP · Local Provenance  | -0.35     | 0.07 | -0.49   | -0.20    |
| NK · Local Provenance  | -0.34     | 0.07 | -0.49   | -0.20    |
| PK · Local Provenance  | -0.28     | 0.07 | -0.43   | -0.14    |
| NPK · Local Provenance | -0.52     | 0.07 | -0.66   | -0.37    |

**Figure S2.2:** Effect of nutrient enrichment (N,P,K and their combinations) on non-native and native species' change in abundance.

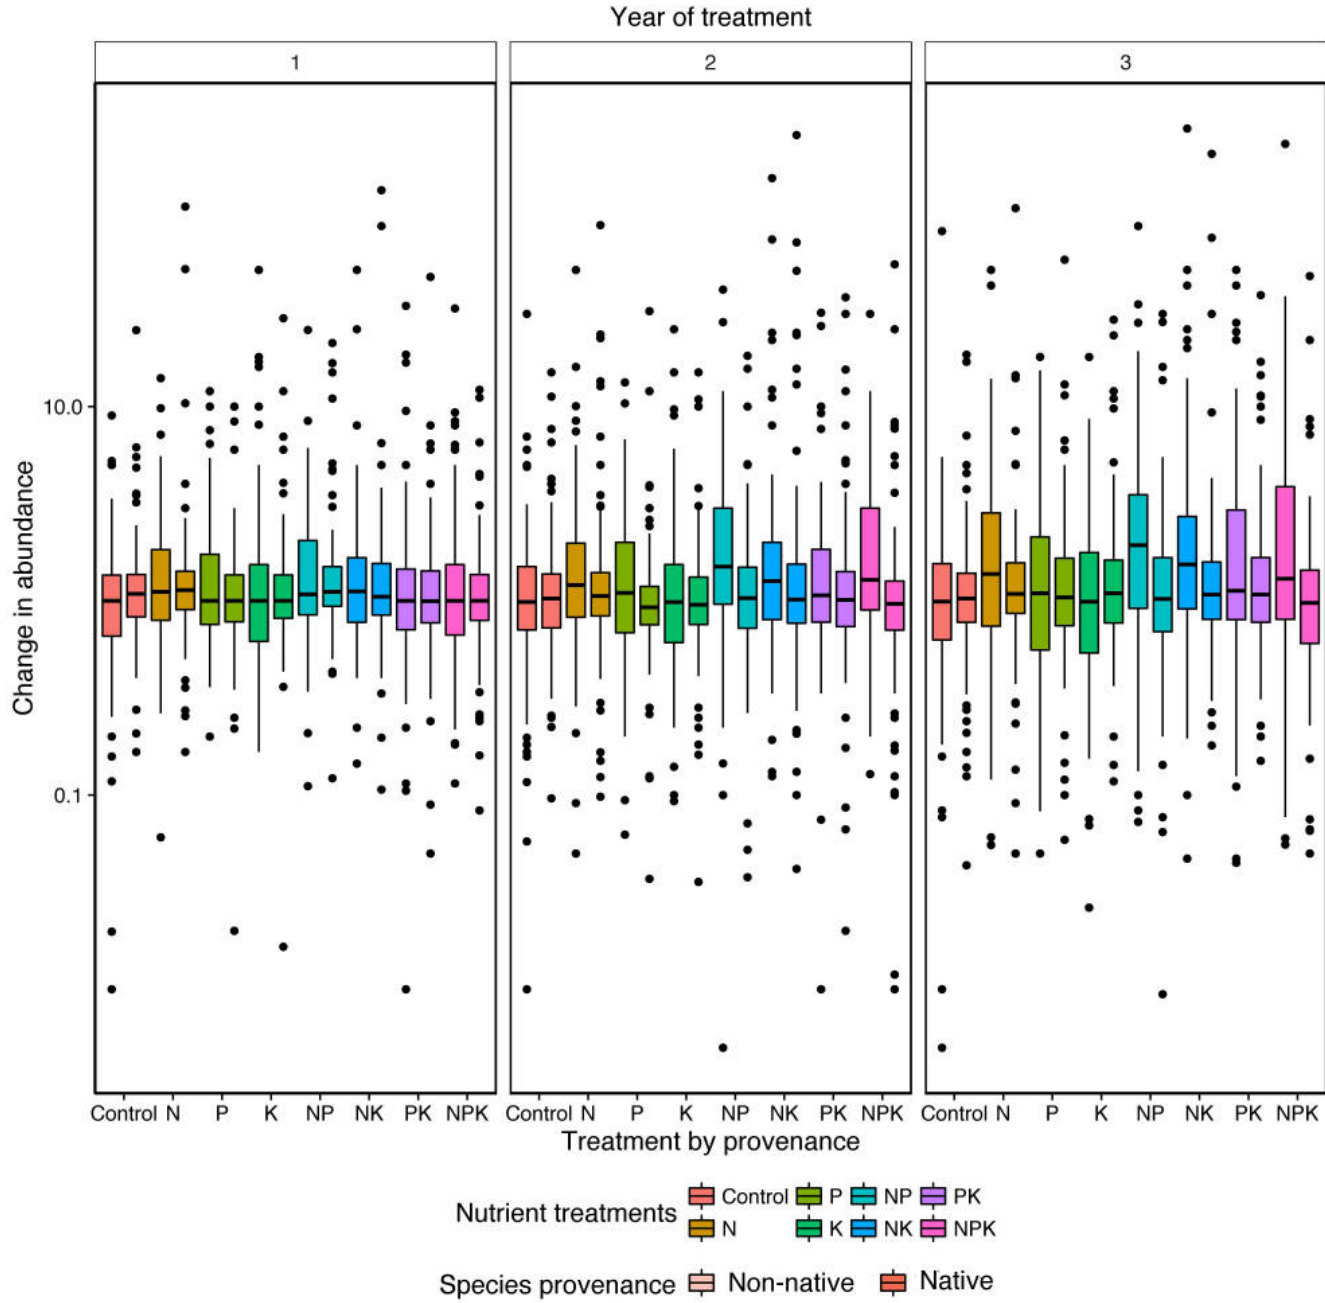

**Table S2.15:** Comparison of models used to describe the influence of growing season, annual and long-term climate variables on change in richness and abundance of native and non-native species under nutrient enrichment treatments (N, P, K and their combinations). Shown are values of  $\Delta AIC$  (comparison of AIC values to the best model AIC;  $\Delta AIC = AIC_{modeli} - \min AIC$ ). The  $\Delta AIC$  score for the best models are in bold. Mean refers to models including only mean climate variables, Var refers to models only including variance in the same climate variables, Mean + var are models that include both type of climate variables. Extreme events are models that include the number of extreme hot, cold, wet and dry days.

| Model                                     | Change richness |              | Change abundance |              |
|-------------------------------------------|-----------------|--------------|------------------|--------------|
|                                           | k               | $\Delta AIC$ | k                | $\Delta AIC$ |
| <b>Growing season</b>                     |                 |              |                  |              |
| Mean                                      | 68              | 305.0        | 68               | 202.0        |
| Var                                       | 68              | 441.0        | 68               | 289.0        |
| Mean + var (water avail)                  | 100             | 462.0        | 100              | 308.0        |
| Mean + var (var water avail)              | 100             | 475.0        | 100              | 311.0        |
| <b>Annual extreme events</b>              |                 |              |                  |              |
| Extreme events                            | 85              | 19.1         | 85               | 10.8         |
| <b>Annual</b>                             |                 |              |                  |              |
| Mean                                      | 68              | 343.0        | 68               | <b>0.0</b>   |
| Var                                       | 68              | 47.6         | 68               | 51.9         |
| Mean + var (mean pre and water avail)     | 84              | 15.8         | 84               | 15.6         |
| Mean + var (mean pre and var water avail) | 84              | 36.3         | 84               | 25.5         |
| Mean + var (var pre and water avail)      | 84              | <b>0.0</b>   | 84               | 11.3         |
| Mean + var (var pre and var water avail)  | 84              | 27.0         | 84               | 28.0         |
| <b>Long-term</b>                          |                 |              |                  |              |
| Mean (mean pre)                           | 52              | 247.0        | 52               | 167.0        |
| Mean (water avail)                        | 52              | 245.0        | 52               | 152.0        |
| Var                                       | 68              | 335.0        | 68               | 254.0        |
| Mean + var (mean pre)                     | 84              | 336.0        | 84               | 204.0        |
| Mean + var (water avail)                  | 84              | 340.0        | 84               | 169.0        |
| Mean + var (var water avail)              | 84              | 369.0        | 84               | 203.0        |

**Table S2.16:** Effect of nutrient enrichment (N,P,K and their combinations), annual climate variables and their interaction on non-native and native species' change in richness.

| Terms                                    | Chi sq | d.f. | P-value  |
|------------------------------------------|--------|------|----------|
| Var pre                                  | 0.39   | 1    | 0.53     |
| Mean temp                                | 0.46   | 1    | 0.49     |
| Water avail                              | 1.06   | 1    | 0.30     |
| Var temp                                 | 0.01   | 1    | 0.94     |
| Local provenance                         | 10.15  | 1    | 0.001    |
| Nut trt                                  | 24.64  | 7    | 0.0009   |
| Year of trt                              | 5.92   | 1    | 0.02     |
| Var pre · Local provenance               | 9.19   | 1    | 0.002    |
| Mean temp · Local provenance             | 35.86  | 1    | < 0.0001 |
| Water avail · Local provenance           | 16.09  | 1    | 0.0001   |
| Var temp · Local provenance              | 11.27  | 1    | 0.0008   |
| Var pre · Nut trt                        | 11.43  | 7    | 0.12     |
| Mean temp · Nut trt                      | 7.10   | 7    | 0.42     |
| Water avail · Nut trt                    | 6.22   | 7    | 0.51     |
| Var temp · Nut trt                       | 5.85   | 7    | 0.56     |
| Local provenance · Nut trt               | 47.53  | 7    | < 0.0001 |
| Var pre · Local provenance · Nut trt     | 7.17   | 7    | 0.41     |
| Mean temp · Local provenance · Nut trt   | 22.73  | 7    | 0.002    |
| Water avail · Local provenance · Nut trt | 24.74  | 7    | 0.0008   |
| Var temp · Local provenance · Nut trt    | 7.99   | 7    | 0.33     |



**Table S2.17:** Coefficients estimates, standard errors and 2.5% and 97.5% confidence intervals for the effect of climate, nutrient treatments (N,P,K and their combinations) and their interaction on non-native and native species change in richness. Only significant second and third higher order interactions and their main terms are included in the table (see Anova table for this model above ).

| Terms                          | Estimates | S.E. | 2.5% CI | 97.5% CI |
|--------------------------------|-----------|------|---------|----------|
| Var pre                        | 0.06      | 0.03 | -0.009  | 0.12     |
| Mean temp                      | 0.04      | 0.04 | -0.04   | 0.12     |
| Water avail                    | 0.04      | 0.03 | -0.02   | 0.10     |
| Var temp                       | -0.001    | 0.04 | -0.08   | 0.08     |
| Local provenance               | 0.15      | 0.02 | 0.10    | 0.19     |
| N                              | 0.03      | 0.02 | -0.001  | 0.06     |
| P                              | 0.04      | 0.02 | 0.01    | 0.08     |
| K                              | 0.04      | 0.02 | 0.01    | 0.08     |
| NP                             | 0.004     | 0.02 | -0.03   | 0.04     |
| NK                             | 0.04      | 0.02 | 0.009   | 0.07     |
| PK                             | 0.04      | 0.02 | 0.009   | 0.07     |
| NPK                            | -0.009    | 0.02 | -0.04   | 0.02     |
| Year trt                       | -0.05     | 0.02 | -0.08   | -0.009   |
| Var pre · Local Provenance     | -0.11     | 0.05 | -0.21   | -0.02    |
| Mean temp · Local Provenance   | -0.19     | 0.05 | -0.29   | -0.08    |
| Water avail · Local Provenance | -0.17     | 0.04 | -0.24   | -0.10    |
| Var temp · Local Provenance    | 0.05      | 0.05 | -0.05   | 0.16     |
| Mean temp · N                  | -0.02     | 0.04 | -0.09   | 0.06     |
| Mean temp · P                  | 0.001     | 0.04 | -0.08   | 0.08     |
| Mean temp · K                  | -0.03     | 0.04 | -0.11   | 0.04     |

**Table S2.17:** *(continued)*

| Terms                                     | Estimates | S.E. | 2.5% CI | 97.5% CI |
|-------------------------------------------|-----------|------|---------|----------|
| Mean temp · NP                            | -0.02     | 0.04 | -0.10   | 0.06     |
| Mean temp · NK                            | -0.04     | 0.04 | -0.12   | 0.04     |
| Mean temp · PK                            | 0.03      | 0.04 | -0.05   | 0.11     |
| Mean temp · NPK                           | -0.06     | 0.04 | -0.14   | 0.01     |
| Water avail · N                           | 0.005     | 0.03 | -0.06   | 0.07     |
| Water avail · P                           | -0.02     | 0.03 | -0.09   | 0.04     |
| Water avail · K                           | -0.002    | 0.03 | -0.07   | 0.06     |
| Water avail · NP                          | -0.003    | 0.03 | -0.07   | 0.06     |
| Water avail · NK                          | -0.002    | 0.03 | -0.07   | 0.06     |
| Water avail · PK                          | -0.04     | 0.03 | -0.10   | 0.03     |
| Water avail · NPK                         | -0.06     | 0.03 | -0.12   | 0.008    |
| Local provenance (native) · N             | -0.130    | 0.03 | -0.19   | -0.07    |
| Local provenance (native) · P             | -0.12     | 0.03 | -0.19   | -0.06    |
| Local provenance (native) · K             | -0.10     | 0.03 | -0.16   | -0.04    |
| Local provenance (native) · NP            | -0.12     | 0.03 | -0.18   | -0.05    |
| Local provenance (native) · NK            | -0.19     | 0.03 | -0.25   | -0.12    |
| Local provenance (native) · PK            | -0.12     | 0.03 | -0.18   | -0.06    |
| Local provenance (native) · NPK           | -0.20     | 0.03 | -0.26   | -0.14    |
| Mean temp · Local provenance (native) · N | -0.007    | 0.08 | -0.16   | 0.15     |
| Mean temp · Local provenance (native) · P | 0.03      | 0.08 | -0.12   | 0.19     |

**Table S2.17:** *(continued)*

| Terms                                         | Estimates | S.E. | 2.5% CI | 97.5% CI |
|-----------------------------------------------|-----------|------|---------|----------|
| Mean temp · Local provenance (native) · K     | 0.20      | 0.08 | 0.05    | 0.35     |
| Mean temp · Local provenance (native) · NP    | -0.07     | 0.08 | -0.23   | 0.08     |
| Mean temp · Local provenance (native) · NK    | 0.20      | 0.08 | 0.05    | 0.36     |
| Mean temp · Local provenance (native) · PK    | 0.03      | 0.08 | -0.13   | 0.18     |
| Mean temp · Local provenance (native) · NPK   | 0.14      | 0.08 | -0.01   | 0.29     |
| Water avail · Local provenance (native) · N   | 0.06      | 0.07 | -0.07   | 0.19     |
| Water avail · Local provenance (native) · P   | 0.19      | 0.07 | 0.06    | 0.31     |
| Water avail · Local provenance (native) · K   | 0.17      | 0.07 | 0.04    | 0.29     |
| Water avail · Local provenance (native) · NP  | -0.007    | 0.06 | -0.13   | 0.12     |
| Water avail · Local provenance (native) · NK  | 0.18      | 0.07 | 0.05    | 0.30     |
| Water avail · Local provenance (native) · PK  | 0.07      | 0.07 | -0.06   | 0.20     |
| Water avail · Local provenance (native) · NPK | 0.24      | 0.07 | 0.11    | 0.37     |

**Figure S2.3:** Effect of nutrient enrichment (N,P,K and their combinations), annual mean climate variables and their interaction on non-native and native species' change in richness.

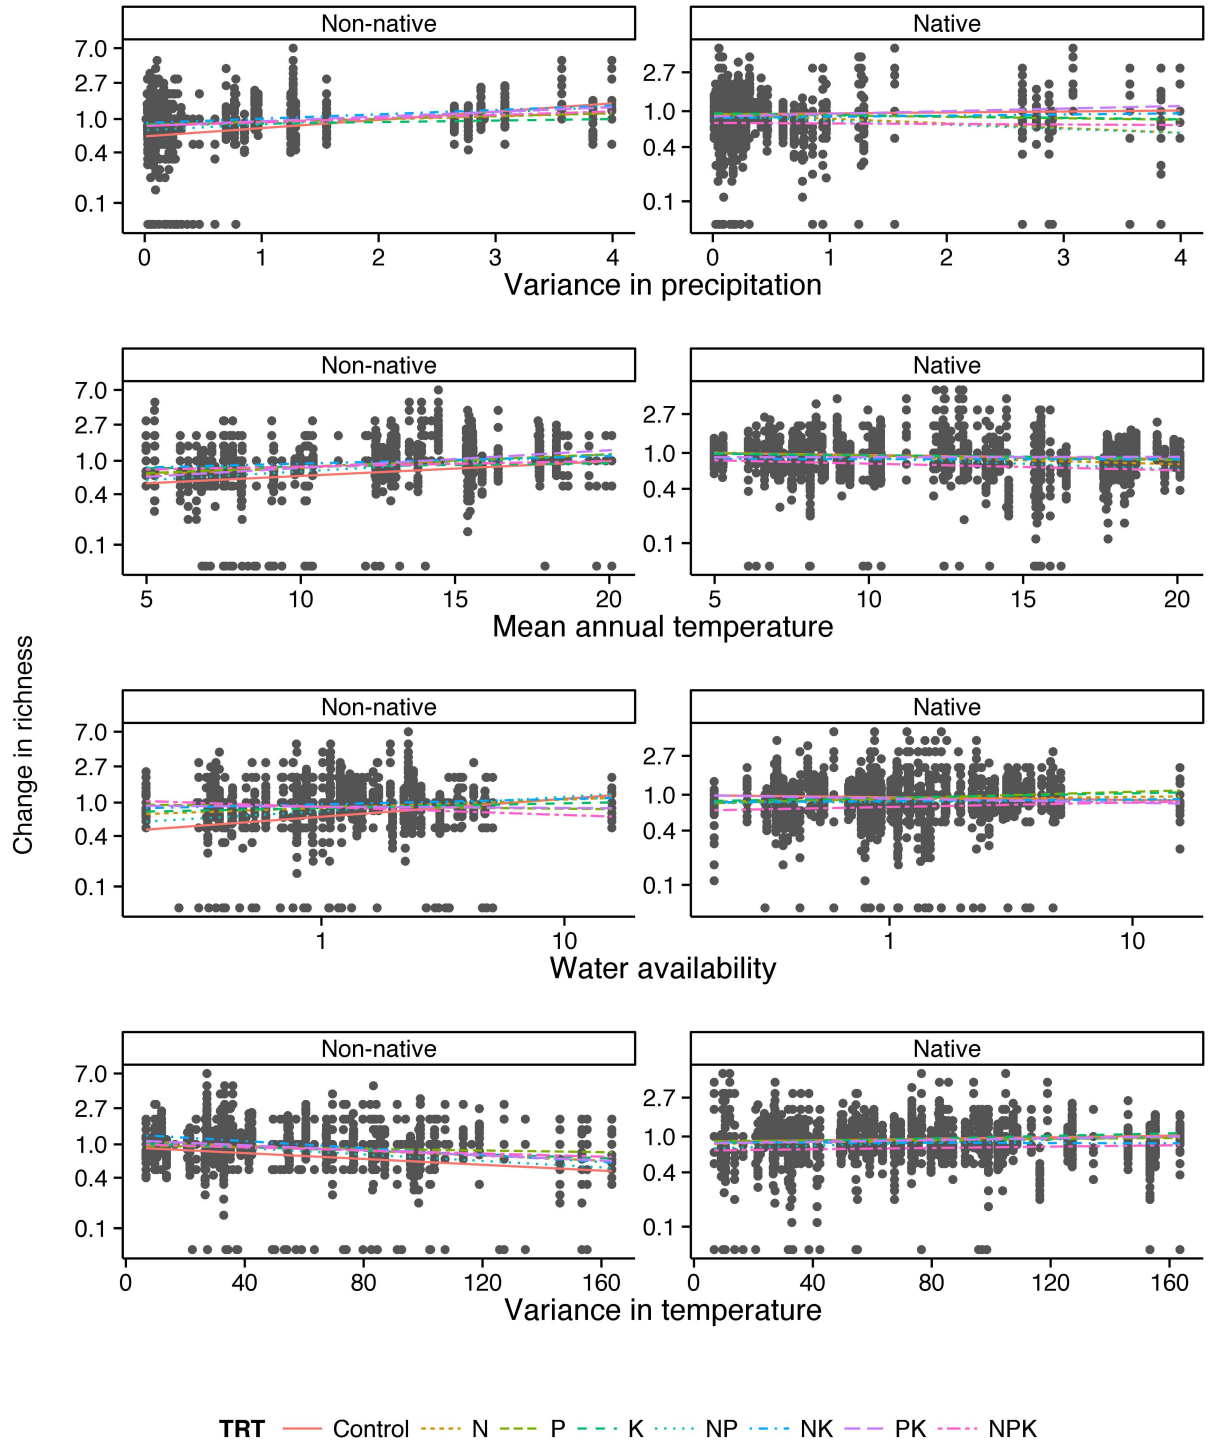

**Table S2.18:** Effect of nutrient enrichment (N,P,K and their combinations), annual mean climate variables and their interaction on non-native and native species' change in abundance.

| Terms                                    | Chi sq | d.f. | P-value  |
|------------------------------------------|--------|------|----------|
| Mean pre                                 | 7.17   | 1    | 0.007    |
| Mean temp                                | 2.29   | 1    | 0.13     |
| Water avail                              | 0.47   | 1    | 0.49     |
| Local provenance                         | 10.38  | 1    | 0.001    |
| Nut trt                                  | 31.55  | 7    | < 0.001  |
| Year of trt                              | 2.79   | 1    | 0.09     |
| Mean pre · Local provenance              | 0.01   | 1    | 0.93     |
| Mean temp · Local provenance             | 66.94  | 1    | < 0.0001 |
| Water avail · Local provenance           | 13.00  | 1    | 0.0003   |
| Mean pre · Nut trt                       | 10.07  | 7    | 0.19     |
| Mean temp · Nut trt                      | 6.86   | 7    | 0.44     |
| Water avail · Nut trt                    | 3.76   | 7    | 0.81     |
| Local provenance · Nut trt               | 58.37  | 7    | < 0.0001 |
| Mean pre · Local provenance · Nut trt    | 6.05   | 7    | 0.53     |
| Mean temp · Local provenance · Nut trt   | 13.46  | 7    | 0.06     |
| Water avail · Local provenance · Nut trt | 13.60  | 7    | 0.06     |

**Table S2.19:** Coefficients estimates, standard errors and 2.5% and 97.5% confidence intervals for the effect of nutrient treatments (N,P,K and their combinations), annual mean climate variables and their interactions on non-native and native species change in abundance. Estimates for non-significant two and three way interactions including nutrient treatments were excluded from this table.

| Terms                           | Estimates | S.E. | 2.5% CI | 97.5% CI |
|---------------------------------|-----------|------|---------|----------|
| Mean pre                        | 0.04      | 0.07 | -0.10   | 0.17     |
| Mean temp                       | 0.14      | 0.07 | 0.002   | 0.28     |
| Water avail                     | 0.08      | 0.06 | -0.04   | 0.19     |
| Local provenance                | 0.36      | 0.05 | 0.26    | 0.46     |
| N                               | 0.13      | 0.04 | 0.06    | 0.21     |
| P                               | 0.11      | 0.04 | 0.04    | 0.19     |
| K                               | 0.11      | 0.04 | 0.04    | 0.18     |
| NP                              | 0.15      | 0.04 | 0.08    | 0.22     |
| NK                              | 0.19      | 0.04 | 0.12    | 0.26     |
| PK                              | 0.14      | 0.04 | 0.07    | 0.22     |
| NPK                             | 0.11      | 0.04 | 0.04    | 0.18     |
| Year trt                        | -0.06     | 0.03 | -0.12   | 0.01     |
| Mean pre · Local provenance     | 0.05      | 0.11 | -0.16   | 0.25     |
| Mean temp · Local provenance    | -0.39     | 0.11 | -0.60   | -0.17    |
| Water avail · Local provenance  | -0.32     | 0.08 | -0.49   | -0.16    |
| Local provenance (native) · N   | -0.30     | 0.07 | -0.45   | -0.16    |
| Local provenance (native) · P   | -0.29     | 0.07 | -0.44   | -0.15    |
| Local provenance (native) · K   | -0.24     | 0.07 | -0.38   | -0.10    |
| Local provenance (native) · NP  | -0.38     | 0.07 | -0.53   | -0.24    |
| Local provenance (native) · NK  | -0.36     | 0.07 | -0.51   | -0.22    |
| Local provenance (native) · PK  | -0.31     | 0.07 | -0.45   | -0.16    |
| Local provenance (native) · NPK | -0.53     | 0.07 | -0.68   | -0.39    |

**Figure S2.4:** Effect of nutrient enrichment (N,P,K and their combinations), annual mean climate variables and their interaction on non-native and native species' change in abundance.

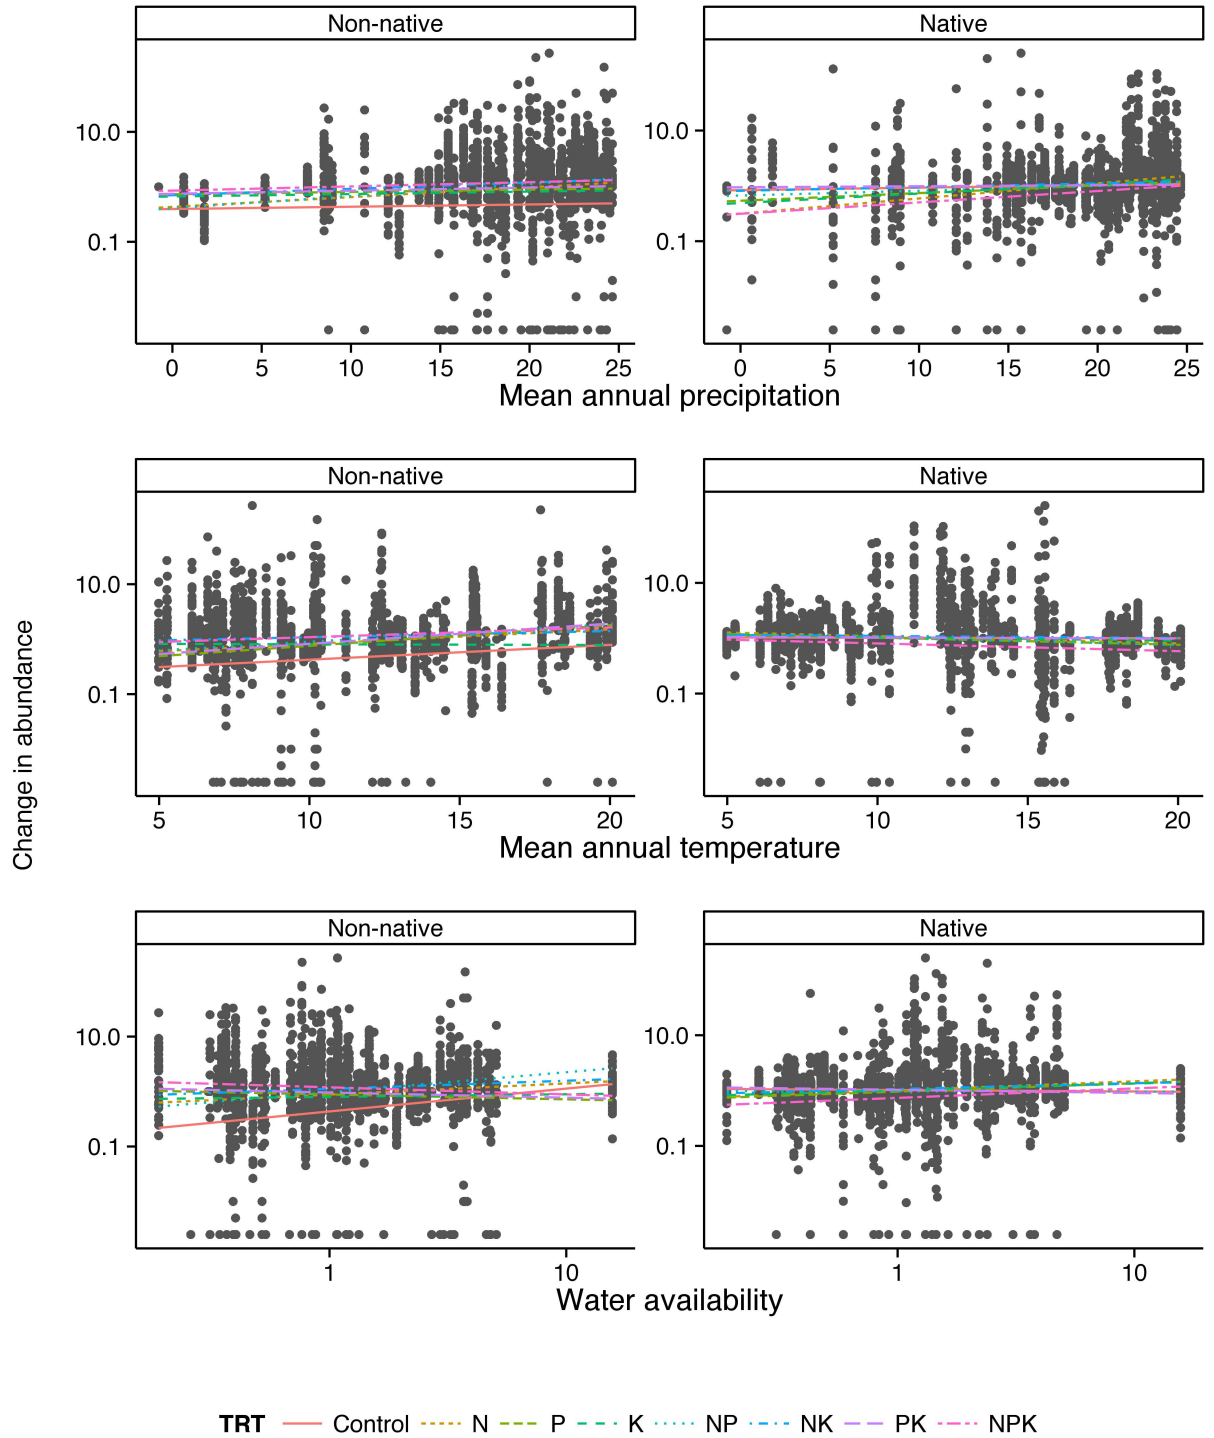

Supplement: rstb20150273supp1.pdf [file rstb20150273supp1.pdf]
